# Supplementary material
Source: Springer Nature journal article supplement (https://www.springermedizin.de/resource/supplementary/13075_2009_2737_MOESM5_ESM.pdf/9692774)

**(a)**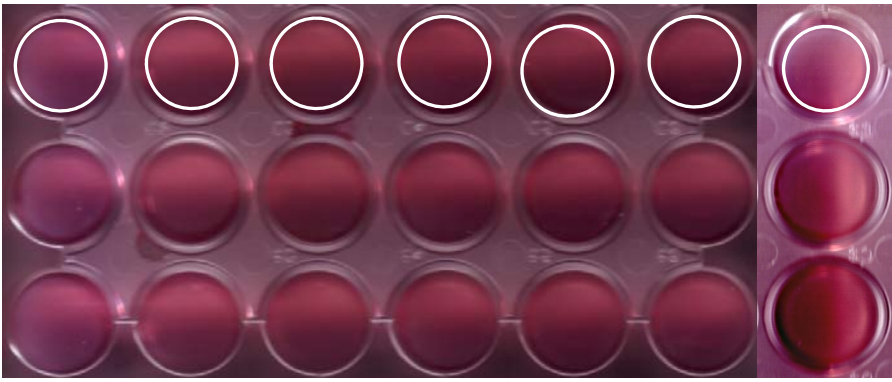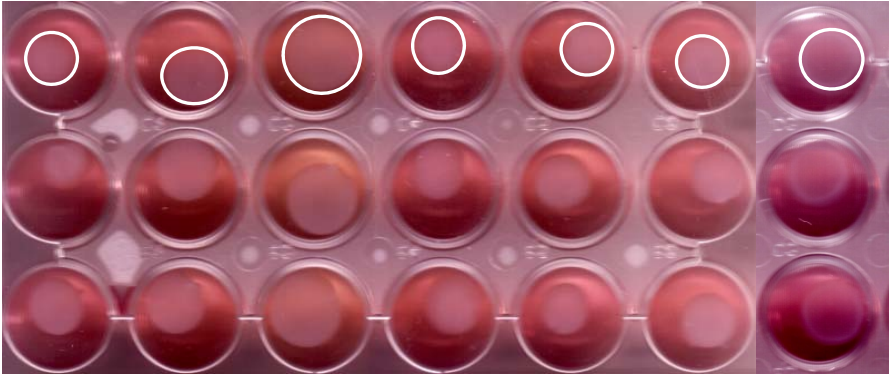

Control    TNF- $\alpha$  1ng/ml    TNF- $\alpha$  10 ng/ml    TNF- $\alpha$  1ng/ml + IFX    TNF- $\alpha$  10 ng/ml + IFX    IFX    TNF- $\alpha$  10 ng/ml + Diclo

**(b)**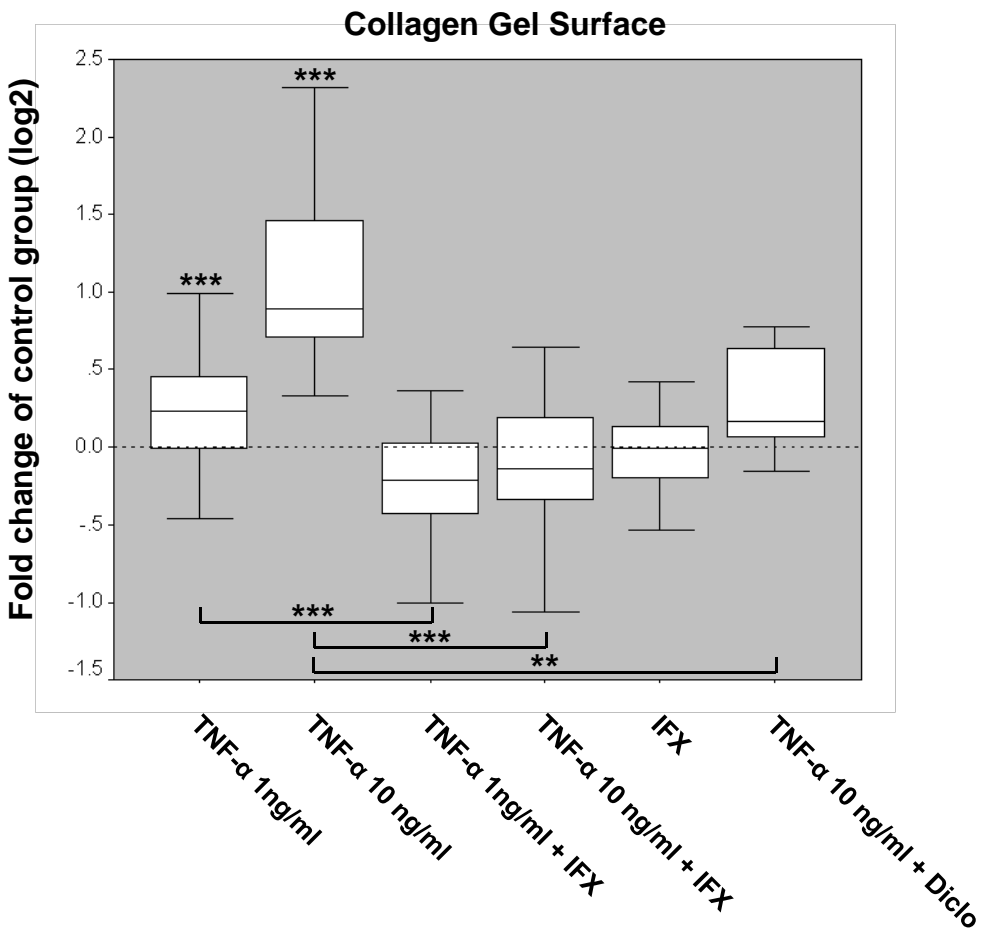

Supplement: MOESM5 [file 9692774]
